# Supplementary material for: Contribution of ERMES subunits to mature peroxisome abundance
Source: PubMed Central journal article supplement (PMC6433259; doi:10.1371/journal.pone.0214287), 2019-03-25
Supplement: pone.0214287.s001.pdf [file pone.0214287.s001.pdf]

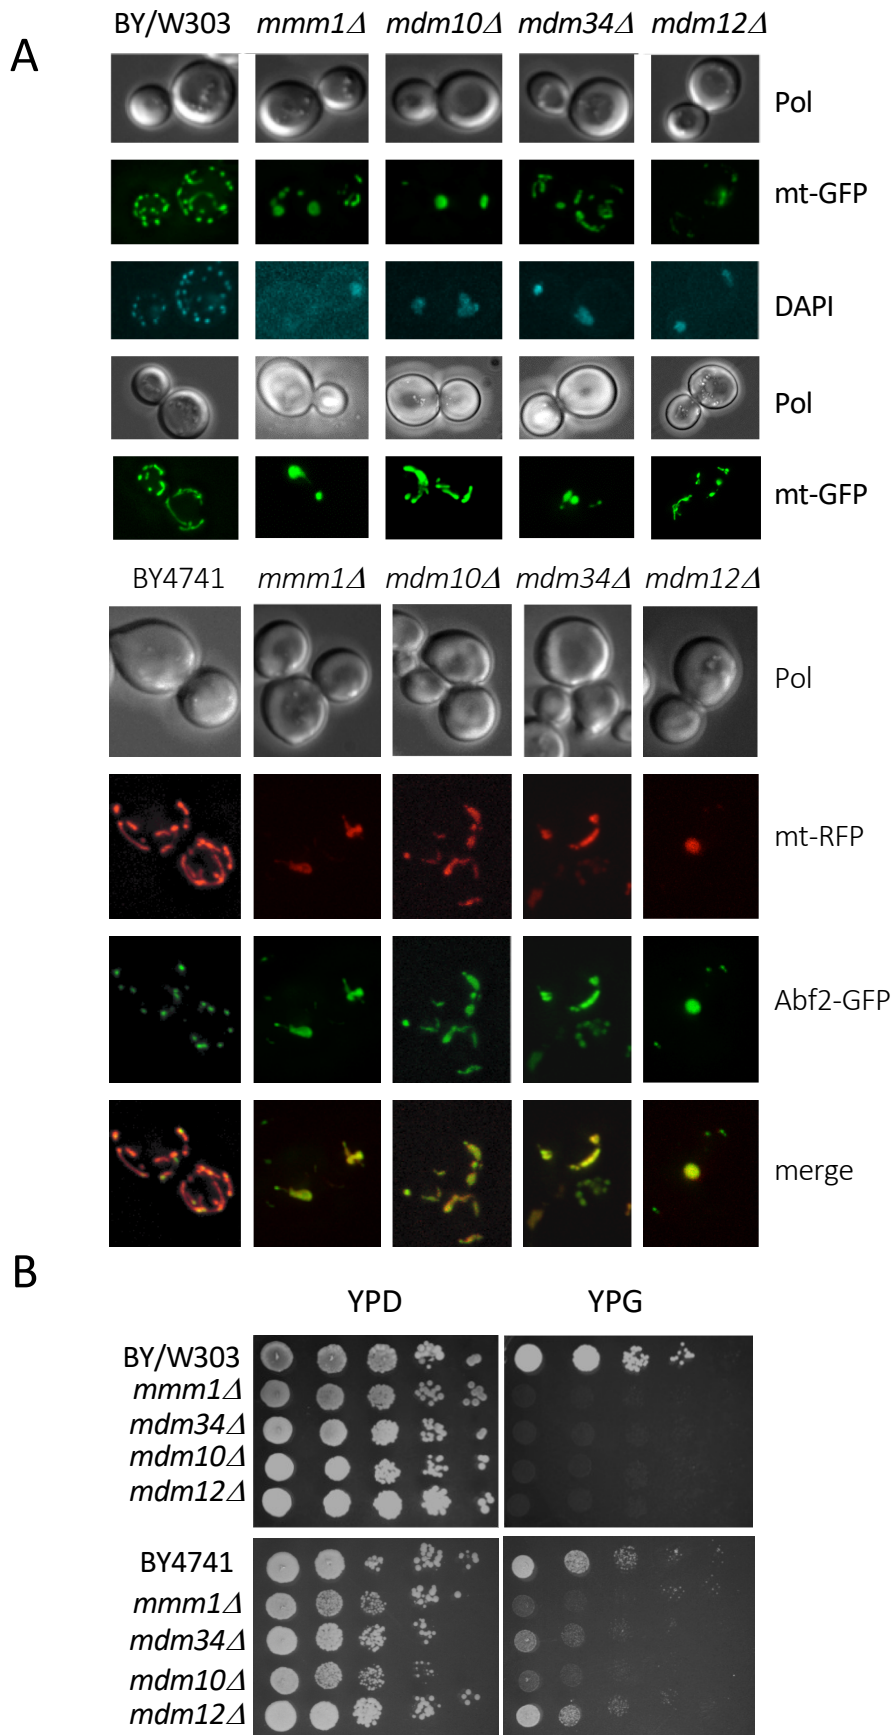

Figure S1: Mitochondrial phenotypes of ERMES mutant strains.
